# Supplementary material for: Risk of SARS-CoV-2 Reinfection 3 Years after the Start of the Pandemic: A Population-Level Observational Study
Source: MDPI journal article supplement (doi:10.3390/life13112111), 2023-10-24
Supplement: s1 [file s1]

**Table S1.** SARS-CoV-2 reinfections, for the total sample and according to selected characteristics, during the pre-Omicron waves (from March 2, 2020 to December 31, 2021). The following subjects were excluded from the overall sample: 104,989 subjects who had no positive swab before November 17, 2021 (to account for a minimum of 45 days between the first and second infection). Also, 2408 subjects who had a second positive swab after December 31, 2021 were reassigned to the group without a reinfection.

| Variables                                   | Total sample<br>N | Reinfections <sup>a</sup><br>% (n) | Reinfection<br>AHR (95% CI) |
|---------------------------------------------|-------------------|------------------------------------|-----------------------------|
| Overall                                     | 16,423            | 0.37 (60)                          | --                          |
| Age class, years                            |                   |                                    |                             |
| 60+                                         | 4172              | 0.70 (29)                          | 1 (ref.)                    |
| 30-59                                       | 8326              | 0.31 (26)                          | 2.37 (0.79-7.07)            |
| 10-29                                       | 3925              | 0.13 (5)                           | 5.21 (1.65-16.5)            |
| Mean age in years (SD)                      | 45.6±20.1         | 35.4±17.2                          | 0.97 (0.96-0.99)            |
| Gender                                      |                   |                                    |                             |
| - Males                                     | 8316              | 0.41 (34)                          | 1 (ref.)                    |
| - Females                                   | 8107              | 0.32 (26)                          | 1.34 (0.80-2.24)            |
| Severe COVID-19 after the first infection   |                   |                                    |                             |
| - No                                        | 14,507            | 0.39 (57)                          | 1 (ref.)                    |
| - Yes                                       | 1916              | 0.16 (3)                           | 0.71 (0.21-2.44)            |
| Diabetes <sup>b</sup>                       |                   |                                    |                             |
| - No                                        | 15,367            | 0.38 (58)                          | 1 (ref.)                    |
| - Yes                                       | 1056              | 0.19 (2)                           | 1.17 (0.26-5.38)            |
| Hypertension <sup>b</sup>                   |                   |                                    |                             |
| - No                                        | 14,347            | 0.40 (57)                          | 1 (ref.)                    |
| - Yes                                       | 2076              | 0.14 (3)                           | 0.79 (0.20-3.20)            |
| Cardiovascular diseases <sup>b</sup>        |                   |                                    |                             |
| - No                                        | 13,621            | 0.40 (54)                          | 1 (ref.)                    |
| - Yes                                       | 2802              | 0.21 (6)                           | 1.32 (0.48-3.65)            |
| COPD <sup>b</sup>                           |                   |                                    |                             |
| - No                                        | 15,372            | 0.37 (57)                          | 1 (ref.)                    |
| - Yes                                       | 1051              | 0.29 (3)                           | 0.99 (0.31-3.20)            |
| Kidney diseases <sup>b</sup>                |                   |                                    |                             |
| - No                                        | 15,923            | 0.38 (60)                          | Not estimable               |
| - Yes                                       | 500               | 0.00 (0)                           | Not estimable               |
| Cancer <sup>b</sup>                         |                   |                                    |                             |
| - No                                        | 15,581            | 0.37 (58)                          | 1 (ref.)                    |
| - Yes                                       | 842               | 0.24 (2)                           | 1.31 (0.31-5.61)            |
| At least one chronic condition <sup>c</sup> |                   |                                    |                             |
| - No                                        | 11,730            | 0.43 (50)                          | 1 (ref.)                    |
| - Yes                                       | 4693              | 0.21 (10)                          | 0.98 (0.46-2.10)            |
| SARS-CoV-2 Vaccine <sup>d</sup>             |                   |                                    |                             |

|                   |        |           |                  |
|-------------------|--------|-----------|------------------|
| - No doses        | 13,025 | 0.42 (55) | 1 (ref.)         |
| - 1 or 2 doses    | 3285   | 0.15 (5)  | 0.39 (0.16-0.99) |
| - 3 or more doses | 113    | 0.00 (0)  | Not estimable    |

---

AHR: adjusted hazard ratio; CI: confidence interval; SD: standard deviation; ref.: reference category.

<sup>a</sup> Two positive tests detected at least 45 days apart with at least 1 negative test detected between the first and second episode.

<sup>b</sup> Please see text for details.

<sup>c</sup> At least one among diabetes, hypertension, cardiovascular diseases, chronic obstructive pulmonary diseases, kidney diseases or cancer.

<sup>d</sup> Subjects receiving at least one dose of BNT162b2, ChAdOx1 nCoV-19, mRNA-1273, NVX-CoV2373 or JNJ-78436735 vaccines, at least 14 days before the reinfection. Only the vaccinations that were performed before the Omicron wave (January 1, 2022) were considered in this analysis.

**Table S2** SARS-CoV-2 reinfections, for the total sample and according to selected characteristics, during the Omicron wave (from January 1, 2022). The following subjects were excluded from the overall sample: 60 subjects who had a reinfection before January 1, 2022.

| Variables                                   | Total sample<br>N | Reinfections <sup>a</sup><br>% (n) | p <sup>b</sup> | Reinfection<br>AHR (95% CI) |
|---------------------------------------------|-------------------|------------------------------------|----------------|-----------------------------|
| Overall                                     | 121,352           | 5.34 (6481)                        | --             | --                          |
| Age class, years                            |                   |                                    |                |                             |
| 60+                                         | 28,732            | 5.39 (1550)                        |                | 1 (ref.)                    |
| 30-59                                       | 61,983            | 6.14 (3803)                        | <0.001         | 1.45 (1.34-1.57)            |
| 10-29                                       | 30,637            | 3.68 (1128)                        | 0.001          | 1.16 (1.06-1.27)            |
| Mean age in years (SD)                      | 46.1±19.8         | 43.7±18.1                          | 0.4            | 1.00 (1.00-1.00)            |
| Gender                                      |                   |                                    |                |                             |
| - Males                                     | 55,862            | 4.64 (2593)                        |                | 1 (ref.)                    |
| - Females                                   | 65,490            | 5.94 (3888)                        | <0.001         | 1.37 (1.30-1.44)            |
| Severe COVID-19 after the first infection   |                   |                                    |                |                             |
| - No                                        | 118,068           | 5.18 (6114)                        |                | 1 (ref.)                    |
| - Yes                                       | 3284              | 11.2 (367)                         | 0.026          | 0.88 (0.79-0.98)            |
| Diabetes <sup>c</sup>                       |                   |                                    |                |                             |
| - No                                        | 115,457           | 5.35 (6181)                        |                | 1 (ref.)                    |
| - Yes                                       | 5895              | 5.09 (300)                         | 0.6            | 1.04 (0.91-1.17)            |
| Hypertension <sup>c</sup>                   |                   |                                    |                |                             |
| - No                                        | 106,654           | 5.45 (5814)                        |                | 1 (ref.)                    |
| - Yes                                       | 14,698            | 4.54 (667)                         | 0.007          | 1.15 (1.04-1.27)            |
| Cardiovascular diseases <sup>c</sup>        |                   |                                    |                |                             |
| - No                                        | 110,891           | 5.27 (5841)                        |                | 1 (ref.)                    |
| - Yes                                       | 10,461            | 6.12 (640)                         | 0.13           | 0.93 (0.84-1.02)            |
| COPD <sup>c</sup>                           |                   |                                    |                |                             |
| - No                                        | 116,189           | 5.30 (6153)                        |                | 1 (ref.)                    |
| - Yes                                       | 5163              | 6.35 (328)                         | 0.026          | 1.14 (1.02-1.27)            |
| Kidney diseases <sup>c</sup>                |                   |                                    |                |                             |
| - No                                        | 119,279           | 5.32 (6340)                        |                | 1 (ref.)                    |
| - Yes                                       | 2073              | 6.80 (141)                         | 0.016          | 1.24 (1.04-1.48)            |
| Cancer <sup>c</sup>                         |                   |                                    |                |                             |
| - No                                        | 114,950           | 5.38 (6189)                        |                | 1 (ref.)                    |
| - Yes                                       | 6402              | 4.56 (292)                         | 0.4            | 1.05 (0.93-1.19)            |
| At least one chronic condition <sup>d</sup> |                   |                                    |                |                             |
| - No                                        | 93,870            | 5.34 (5012)                        |                | 1 (ref.)                    |
| - Yes                                       | 27,482            | 5.35 (1469)                        | <0.001         | 1.13 (1.05-1.20)            |
| SARS-CoV-2 Vaccine <sup>e</sup>             |                   |                                    |                |                             |
| - No doses                                  | 14,977            | 10.9 (1628)                        |                | 1 (ref.)                    |
| - 1 or 2 doses                              | 38,734            | 8.12 (3147)                        | <0.001         | 0.71 (0.67-0.76)            |

|                   |        |             |        |                  |
|-------------------|--------|-------------|--------|------------------|
| - 3 or more doses | 67,641 | 2.52 (1706) | <0.001 | 0.73 (0.68-0.78) |
|-------------------|--------|-------------|--------|------------------|

---

AHR: adjusted hazard ratio; CI: confidence interval; SD: standard deviation; ref.: reference category.

<sup>a</sup> Two positive tests detected at least 45 days apart with at least 1 negative test detected between the first and second episode.

<sup>b</sup> p-value from the Cox proportional hazard model.

<sup>c</sup> Please see text for details.

<sup>d</sup> At least one among diabetes, hypertension, cardiovascular diseases, chronic obstructive pulmonary diseases, kidney diseases or cancer.

<sup>e</sup> Subjects receiving at least one dose of BNT162b2, ChAdOx1 nCoV-19, mRNA-1273, NVX-CoV2373 or JNJ-78436735 vaccines, at least 14 days before the reinfection.
